# Supplementary material for: Communication from Learned to Innate Olfactory Processing Centers Is Required for Memory Retrieval in Drosophila
Source: PubMed Central journal article supplement (PMC6226615; doi:10.1016/j.neuron.2018.08.037), 2018-11-07

**Neuron, Volume 100**

**Supplemental Information**

**Communication from Learned to Innate**

**Olfactory Processing Centers Is Required**

**for Memory Retrieval in *Drosophila***

**Michael-John Dolan, Ghislain Belliard-Guérin, Alexander Shakeel Bates, Shahar Frechter, Aurélie Lampin-Saint-Amaux, Yoshinori Aso, Ruairí J.V. Roberts, Philipp Schlegel, Allan Wong, Adnan Hammad, Davi Bock, Gerald M. Rubin, Thomas Preat, Pierre-Yves Plaçais, and Gregory S.X.E. Jefferis**

**Figure S1: Further anatomical analysis of 71D08-LexA and 37G11-GAL4. Related to Figure 1.**

(A) Partial Z-projection of R71D08-LexA driving GFP. Expression of MBON- $\alpha$ 2sc is observed in the dorsal LH and along the vertical lobe of the MB. Representative image of n=3 stacks. (B-C) Immunohistochemistry of PD2a1/b1 to determine major neurotransmitter. (B) Colocalization of GABA (magenta) and R37G11-GAL driving GFP (green) expression indicates that PD2a1/b1 neurons are not GABAergic. (C) Colocalization of VGlut (magenta) and split-GAL4 line LH989 driving mVenus (green) expression indicates that PD2a1/b1 neurons are not glutamatergic (yellow arrows label sample bouton). For B-C the left panel is a composite while the middle and right panels represent single channels. (D) Immunohistochemistry of LH989 driving RFP in PD2a1/b1 neurons (green) and GFP genetically driven in cholinergic neurons by  $Cha^{M104508}$ -LexA::QFAD. The cluster of PD2a1/b1 cell bodies is labelled with an orange circle. The scale bar for A and D is 30 $\mu$ m and 5 $\mu$ m for B-C. For B-D, each image is a representative slice from n=4 brains.

**Figure S2: Anatomical and behavioural analysis of two other cell-types identified in the overlap screen. Related to Figure 1.**

(A) A segmented image of AV6a1. (B) A segmented image of the identified SIP cell-type. (C) Z-projection of double labelling between AV6a1 dendrites and MBON- $\alpha$ 2sc. MBON- $\alpha$ 2sc presynapses are labelled with Brp(d3)::mCherry (magenta) while AV6a1 is labelled with membrane-bound GFP (in green). (D) Z-projection of double labelling between AV6a1 dendrites and MBON- $\alpha$ 2sc. The MBON- $\alpha$ 2sc presynapses are labelled with Brp(d3)::mCherry (magenta) while the SIP-1 neuron is labelled with membrane-bound GFP (in green). Note that this LexA line contains both MBON- $\alpha$ 2sc (dorsal) and MBON- $\alpha$ 3ap (ventral) axons (E) Unsegmented Z-projection of identified AV6a1 GAL4 line, Insite0089-GAL4, driving CD8::GFP (Green) with an nc82 counterstain (magenta). Representative stack from n=3 brains. This brain is registered to the JFRC2 template brain. (F) Unsegmented Z-projection of identified SIP-1 GAL4 line, R58G03-GAL4, driving CD8::GFP (Green) with an nc82 counterstain (magenta). This brain is registered to the JFRC2 template brain. Data from Virtual Fly Brain ([http://www.virtualflybrain.org/site/vfb\\_site/home.htm](http://www.virtualflybrain.org/site/vfb_site/home.htm)) (G) Flies expressing Shi<sup>ts</sup> driven by Insite0089-GAL4, and their genotypic controls, were trained with a single-cycle protocol at permissive temperature and tested 3h later at restrictive temperature. There was no significant difference in memory performance between the three groups (n = 17,  $F_{(2,50)} = 2.29$ , p = 0.11). (H)

Flies expressing Shi<sup>ts</sup> driven by R58G03-GAL4, and their genotypic controls, were trained with a single-cycle protocol at permissive temperature and tested 3h later at restrictive temperature. There was no significant difference in memory performance between the three groups (n = 14,  $F_{(2,41)} = 1.61$ ,  $p = 0.21$ ). Data are presented as mean±SEM. Scale bar is 30µm for A-B and E-F, 5µm for C-D.

**Figure S3: Permissive temperature controls for 37G11-GAL4 memory retrieval experiments. Related to Figure 1.**

When assayed at the permissive temperature, flies expressing Shi<sup>ts</sup> through R37G11-GAL4 driver performed similarly to their controls for immediate memory (A: n = 8,  $F_{(2,23)} = 3.52$ ,  $p = 0.048$ , no difference between groups in pairwise comparisons), 3h-memory (B: n = 16,  $F_{(2,47)} = 4.23$ ,  $p = 0.02$ , no difference between +/UAS-Shi<sup>ts</sup> and 37G11>UAS-Shi<sup>ts</sup> groups in pairwise comparisons), and long-term memory (C: n = 9–10,  $F_{(2,28)} = 0.53$ ,  $p = 0.59$ ). Data are presented as mean±SEM.

**Figure S4: Permissive temperature controls for split-GAL4 memory retrieval experiments. Related to Figure 2.**

When assayed at the permissive temperature, flies expressing Shi<sup>ts</sup> through LH989 and LH991 performed similarly to their controls for immediate memory after 1x training (A: LH991, n = 12,  $F_{(2,35)} = 0.14$ ,  $p = 0.87$ ; B: LH989, n = 12–13,  $F_{(2,36)} = 3.66$ ,  $p = 0.037$ , no difference between 37G11/+ and 37G11>UAS-Shi<sup>ts</sup> groups in pairwise comparisons), for 3h-memory after 1x training (C: LH991, n = 15,  $F_{(2,44)} = 0.28$ ,  $p = 0.76$ ; D: LH989, n = 10,  $F_{(2,29)} = 1.79$ ,  $p = 0.19$ ), and for long-term memory after spaced training (E: LH991, n = 17,  $F_{(2,47)} = 0.27$ ,  $p = 0.76$ ; F: LH989, n = 7–9,  $F_{(2,24)} = 2.10$ ,  $p = 0.15$ ). Data are presented as mean±SEM.

**Figure S5: Single-cell analysis of PD2a1/b1 GAL4 and split-GAL4 lines. Effectors in landing site VK5 and Electron microscopy reconstruction strategy. Related to Figure 2-4.**

(A) An example a MultiColor FlipOut (MCFO) experiment. A single neuron is labelled in green while the counterstain is nc82 (magenta). The counterstain is registered to the JFRC2013 template brain (B) Skeletonized representations of all 22 single-neurons derived from MCFO registered to JFRC2013 (grey). (C-D) More detailed view of all 22 skeletons from an anterior (C) and dorsal (D) view. For C-D, only the LH (red) and calyx (blue) neuropil regions are labelled. Scale bar is 30µm. (E) Confocal z-projection of R71D08-LexA driving expression of

TdTomato (green) in landing site VK5. Expression recapitulates that of the R71D08 enhancer including MBON- $\alpha$ 2sc and MBON- $\alpha$ '3ap. Counterstain is nc82 (magenta). Representative stack of n=3 brains. (F) Cross-section of the PD2a1/b1 tract in the electron microscopy dataset. Neurons confirmed to be PD2a1/b1 are labelled in light (PD2a1) and dark green (PD2b1). Possible primary neurites in the PD2 tract are labelled with a purple dot (178). The x,y,z position of the tract in the ssTEM whole brain volume is 482684, 206960, 151200 nm, section 4320. (G) Dorsal view of PD2a1 (top) and PD2b1 (bottom) skeletons from MCFO data (blue) and EM reconstructions (green), shown with the LH (green), CA (purple), SIP (yellow) and SMP (orange). Black line bisecting PD2 primary neurite tract indicate position of EM section in (F). Slight offset between light and EM is thought to be a product of registration error (H'-H'')

NBLAST clustering PD2a1 and PD2b1 arbors from EM reconstructed, FlyCircuit and MCFO data using only their axonal compartments (H') or dendritic compartments (H'') Skeletons are colored by the group to which they belong in the dendrogram. In (H) a1 and b1 neurons cluster apart. EM neurons are more similar to each other likely because they are from the same brain whereas the MCFO and FlyCircuit data are from different brains, and have been co-registered. In (H) the main two subdivisions denote the two routes PD2a1/b1 axons take around the MB (purple) vertical lobe. Labels name include the split-Gal4 line that generated the MCFO, or the Gal4 line driven by a neurotransmitter synthesis/processing protein used to generate the FlyCircuit flip-out data, or indicate an EM neuron in Figure 4B''.

**Figure S6: Summary Electron Microscopy data for MBON- $\alpha$ 2sc and PD2a1/b1. Related to Figure 4.**

(A) Bar chart showing the neuropils targeted by the ipsilateral 'fly's right' MBON- $\alpha$ 2sc axon, showing the postsynapses, presynapses and cable that the MBON has in each neuropil. Inset, presynapses across the MBON axon shown coloured by neuropil location. (B) The neuropils targeted by whole 'fly's right' PD2a1/b1 neurons and the PD2a1/b1 postsynapses, presynapses and cable length in each. Inset, postsynapses and presynapses across the PD2a1/b1 neurons shown coloured by neuropil location. (C) Stripchart shows the cable length in  $\mu$ m for PD2a1/b1 dendrites, PD2b1 dendrites and PDa1/b1 axons. Stacked bar chart shows the proportion of cable and postsynapses that were found on microtubule-containing backbone and microtubule free 'twigs'. Inset, visualisation of backbone (red) and twigs (green) in PD2a1#1. (D) Number of presynapses and postsynapses plotted for the presumptive axon and dendrite of individual PD2a1 and PD2b1 neurons. The different categories and region of the cell are represented by distinct

colors (PD2a1 or PD2b1) and shapes (Calyx, LH or whole compartments). Grey crosses indicate the mean. LH=lateral horn, MB\_CA\_R = mushroom body calyx, SIP=superior intermediate protocerebrum, SLP=superior lateral protocerebrum, SMP=superior medial protocerebrum, CRE = crepine, SCL = superior clamp, \_R = fly's right (ipsilateral), \_L = fly's left (contralateral).

**Figure S7: Schematics for live calcium imaging training paradigms. Related to Figure 5.**

Schematics of the 3 hour conditioning protocols used for *in vivo* imaging of odor responses after training with Oct (red) as CS+ (A) or Mch (blue) as CS+ (B). Left represents the actual training paradigm where electric shock (orange spikes) is presented alongside the CS+. Right panel represents the control unpaired protocol where electric shock is presented two minutes before olfactory stimulation. (C) Each of the training paradigm in A-B is considered a single unit which is used to space train flies to generate LTM for imaging 24 hours after training (left panel). The training paradigm described in A or B (depending on CS+) is repeated 5 times with an intertrial interval (ITI) of 15 minutes. For the unpaired control at 24 hours (right panel), the unpaired protocols from A or B (depending on which odor is CS+) is repeated 5 times with an intertrial interval (ITI) of 15 minutes.

**Figure S8: Permissive experiments for innate attraction experiments and genotype controls for MBON- $\alpha$ 2sc silencing during calcium imaging. Related to Figure 6 and 7.**

(A-D) Control experiments where animals did not have the LexAop-Shibire<sup>ts1</sup> transgene to control for effects of the temperature shifts on olfactory coding. (A) Response of PD2a1/b1 axons to Oct, recorded by calcium imaging without MBON- $\alpha$ 2sc silencing. On left, time traces of normalized GCaMP3 fluorescence (see methods) are shown at permissive (blue) and restrictive (red) temperature in response to Oct stimulation (light blue bar). On right, the integral of the absolute odor responses for each individual fly at the permissive (blue) and restrictive (red) temperatures are plotted, which no change in response to Oct after MBON- $\alpha$ 2sc silencing (n=6, paired t-test=0.1). (B) Response of PD2a1/b1 axons to Mch, recorded by calcium imaging without MBON- $\alpha$ 2sc silencing. On left, time traces of normalized GCaMP3 fluorescence (see methods) are shown at permissive (blue) and restrictive (red) temperature in response to Mch stimulation (light blue bar). On right, the integral of the absolute odor responses for each individual fly at the permissive (blue) and restrictive (red) temperatures are plotted, which no change in response to Mch after MBON- $\alpha$ 2sc silencing (n=6, paired t-test=0.25). (C) Response of PD2a1/b1 axons to ethyl acetate, recorded by calcium imaging without MBON- $\alpha$ 2sc silencing.

On left, time traces of normalized GCaMP3 fluorescence (see methods) are shown at permissive (blue) and restrictive (red) temperature in response to ethyl acetate stimulation (light blue bar). On right, the integral of the absolute odor responses for each individual fly at the permissive (blue) and restrictive (red) temperatures are plotted, which no change in response to ethyl acetate after MBON- $\alpha$ 2sc silencing (n=6, paired t-test=0.98). (D) Response of PD2a1/b1 axons to vinegar, recorded by calcium imaging without MBON- $\alpha$ 2sc silencing. On left, time traces of normalized GCaMP3 fluorescence (see methods) are shown at permissive (blue) and restrictive (red) temperature in response to vinegar stimulation (light blue bar). On right, the integral of the absolute odor responses for each individual fly at the permissive (blue) and restrictive (red) temperatures are plotted, which no change in response to vinegar after MBON- $\alpha$ 2sc silencing (n=6, paired t-test=0.53). (E) Flies expressing Shi<sup>ts</sup> driven by either LH989 or LH991 showed no impairment to apple cider vinegar relative to their genotype controls at the permissive temperature (n=9-10,  $F_{(4,47)}=0.42$ , p=0.79). (F) Flies expressing Shi<sup>ts</sup> driven by either LH989 or LH991 showed no impairment to ethyl acetate relative to their genotype controls at the permissive temperature (n=8-11,  $F_{(4,45)}=0.41$ , p=0.80). Legend shows the shading representing each genotype.

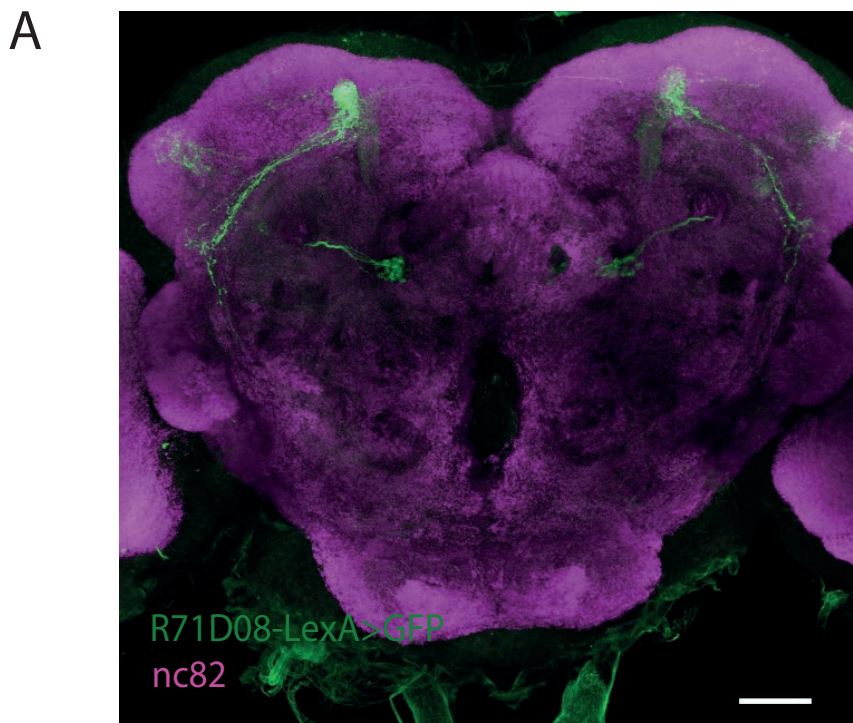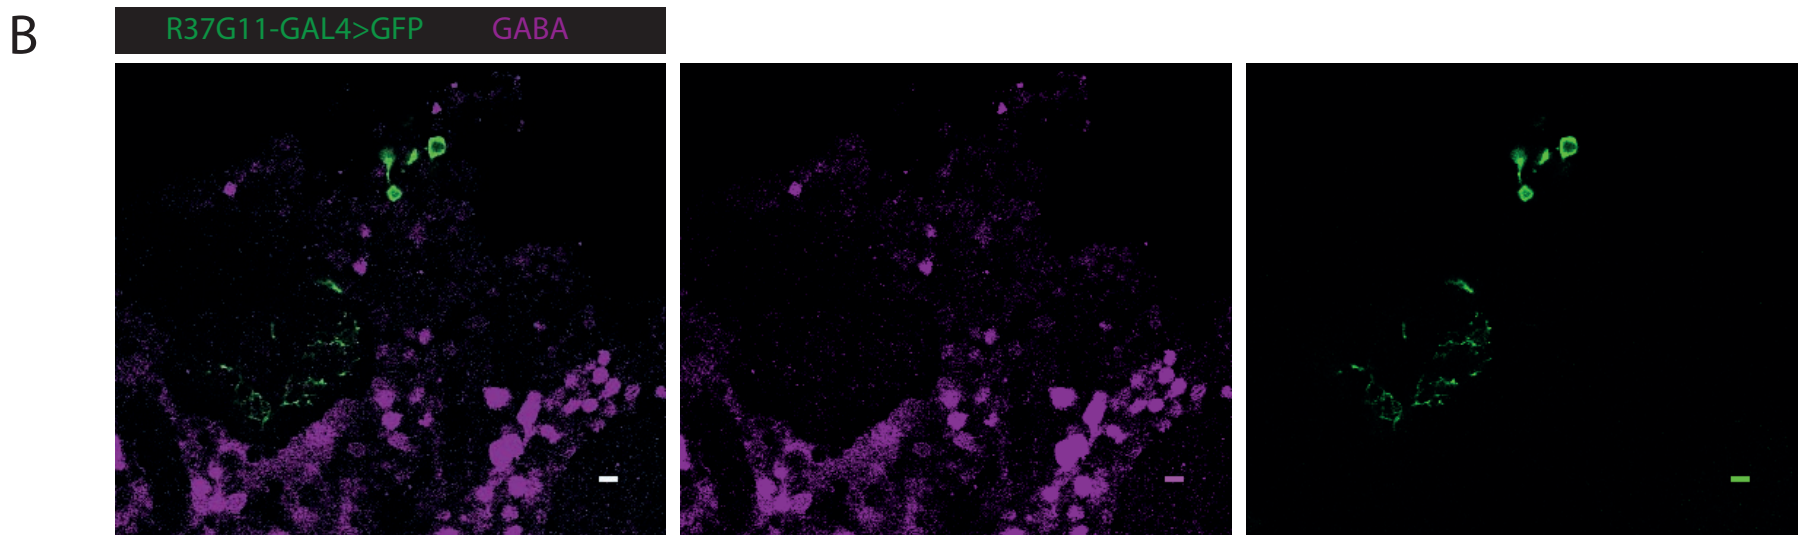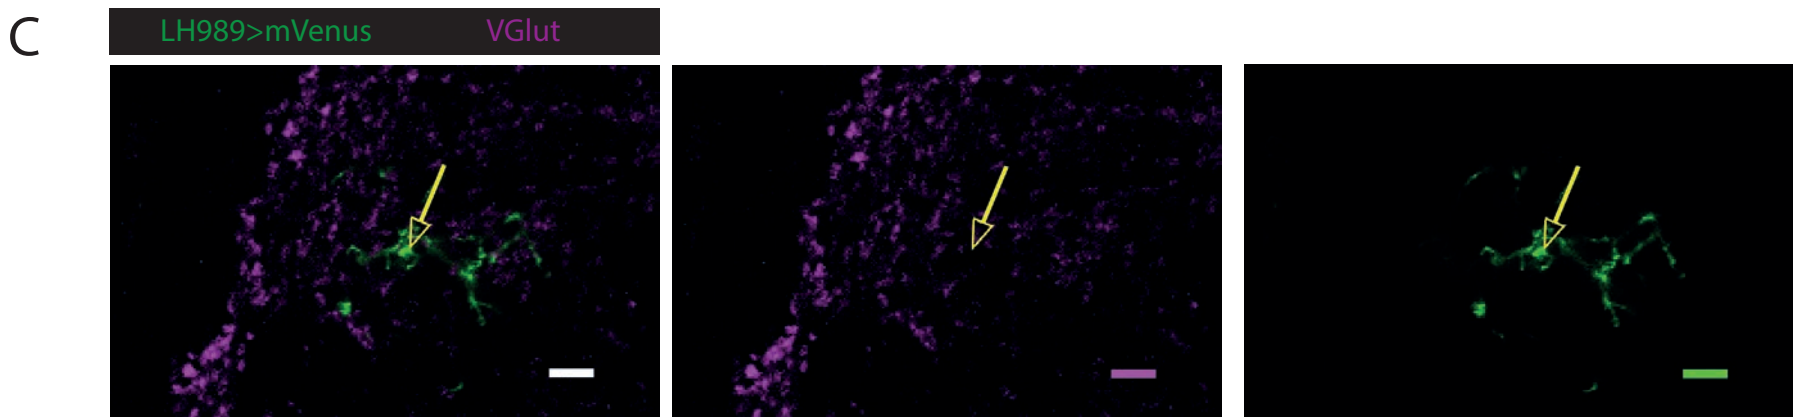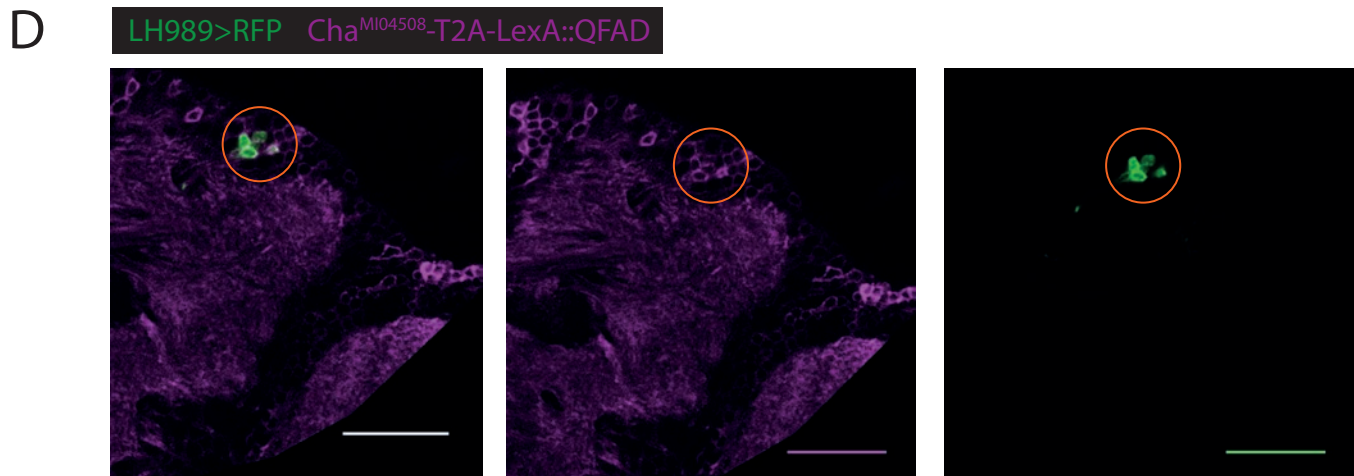

A

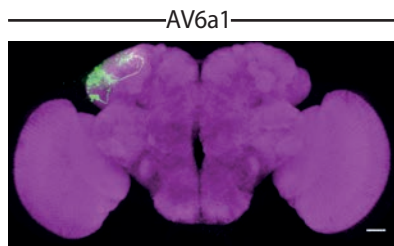

B

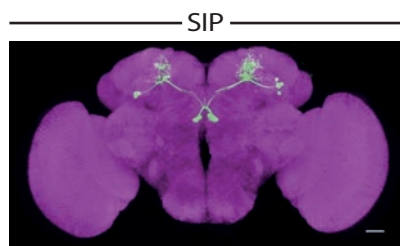

C

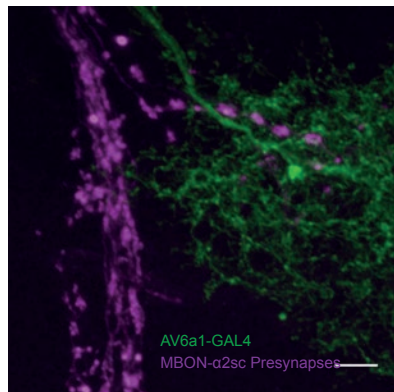

D

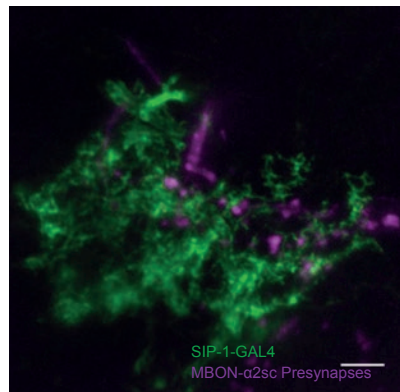

E

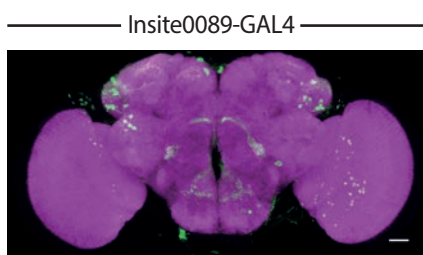

F

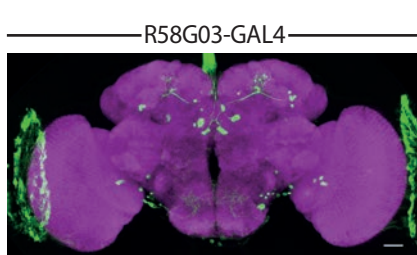

G

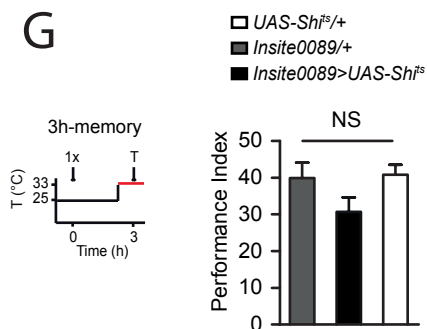

H

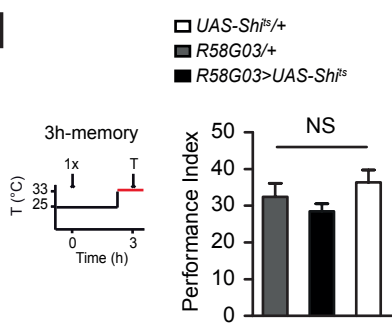



# R37G11-GAL4, Permissive Temperature

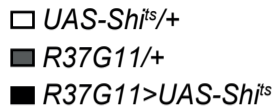

**A** ——— Immediate memory ———

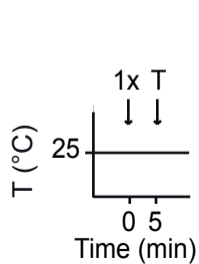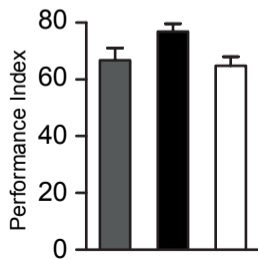

**B** ——— 3h-memory ———

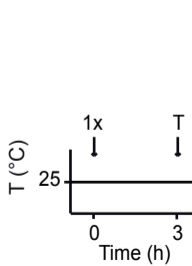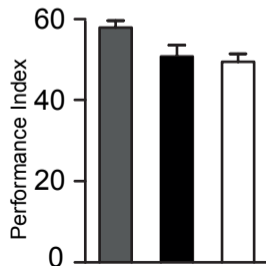

**C** ——— Long-term memory ———

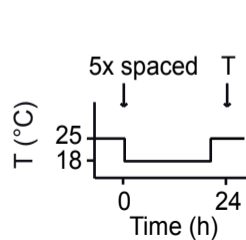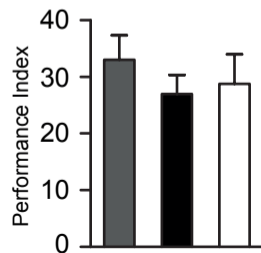

# Split-GAL4, Permissive Temperature

## LH991

## LH989

□ *UAS-Shi<sup>ts</sup>/+*  
■ *LH991/+*  
■ *LH991>UAS-Shi<sup>ts</sup>*

□ *UAS-Shi<sup>ts</sup>/+*  
■ *LH989/+*  
■ *LH989>UAS-Shi<sup>ts</sup>*

### A

#### Immediate memory

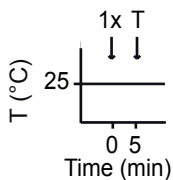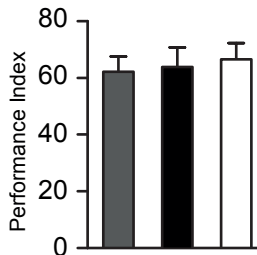

### B

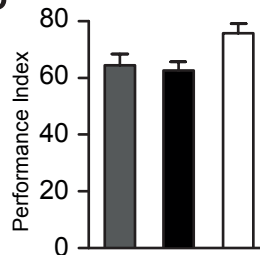

### C

#### 3h-memory

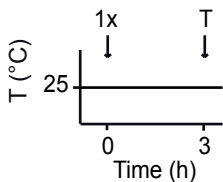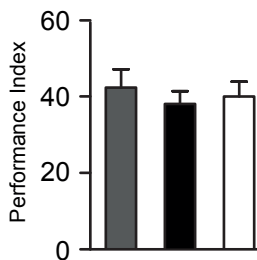

### D

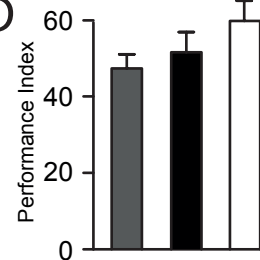

### E

#### Long-term memory

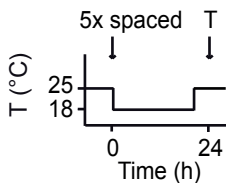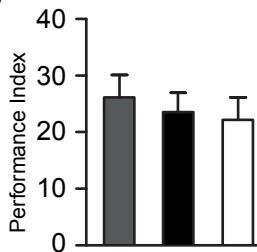

### F

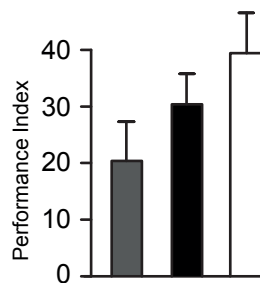

A

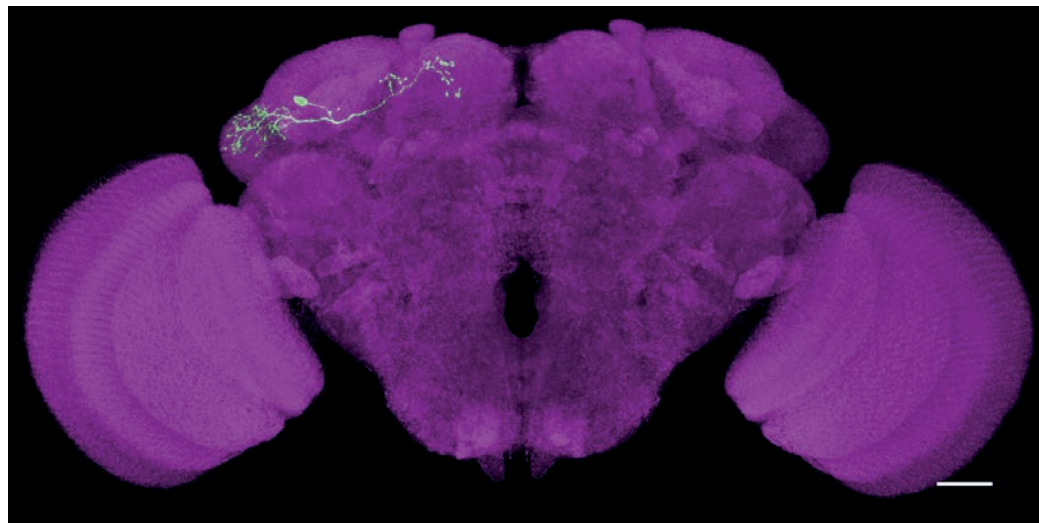

B

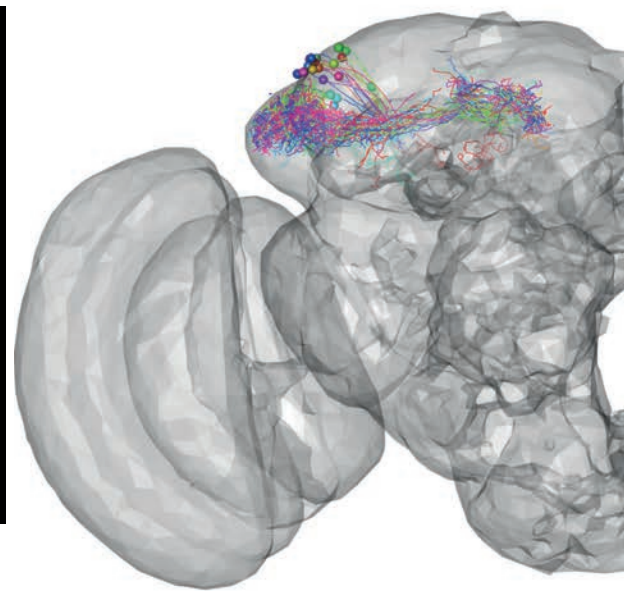

F

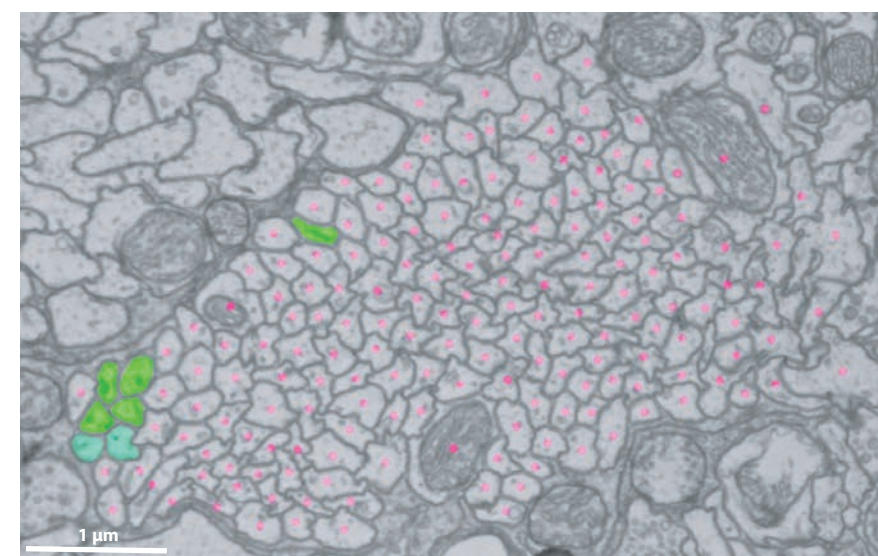

G

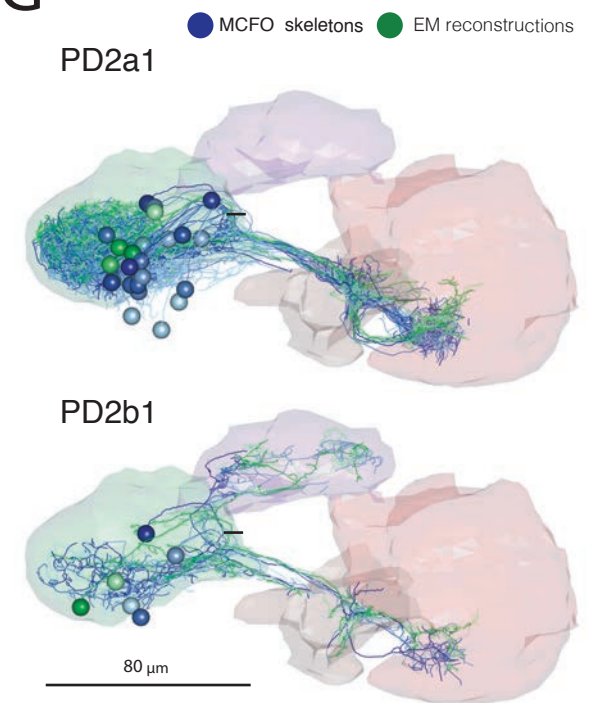

C

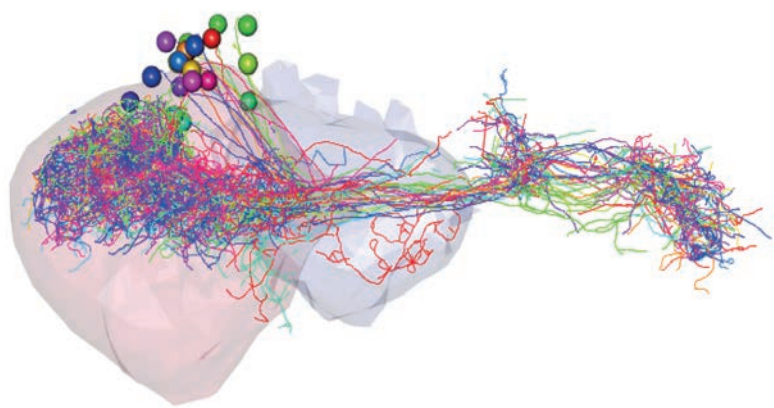

D

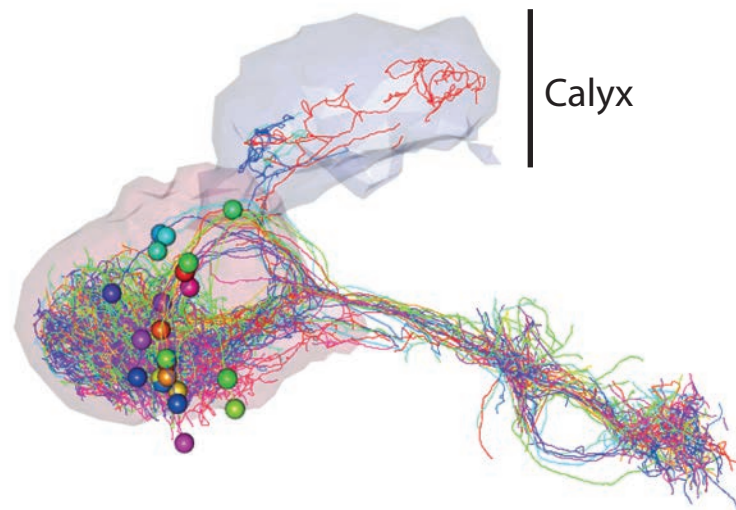

E

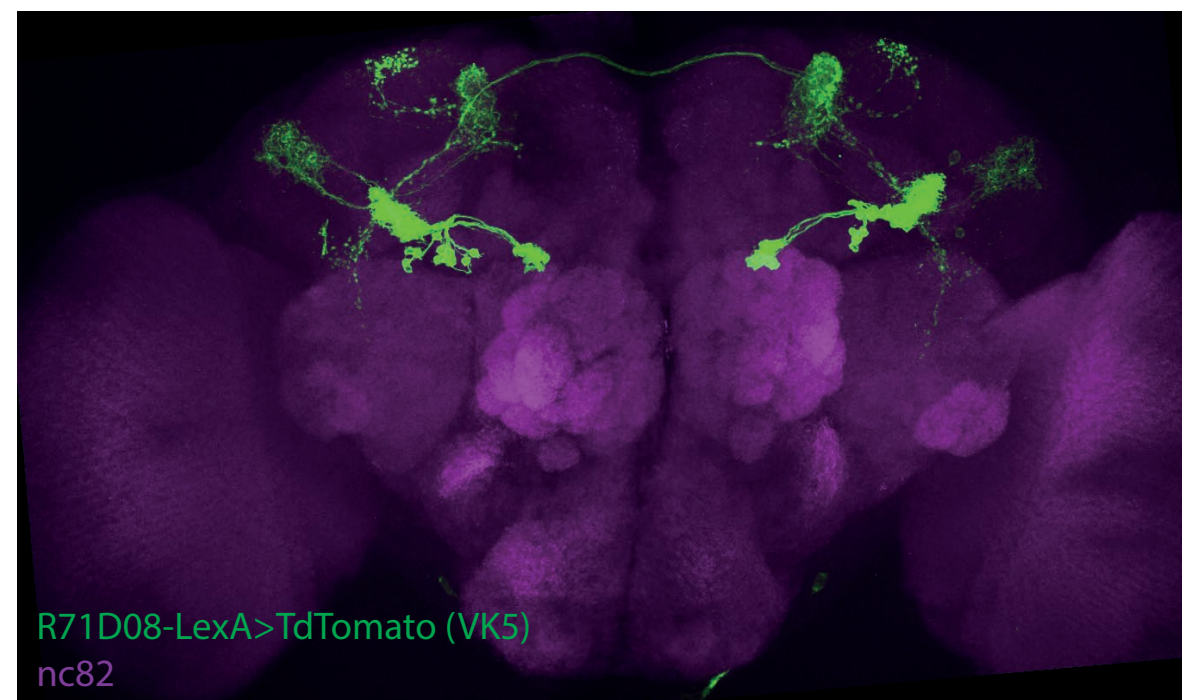

H'

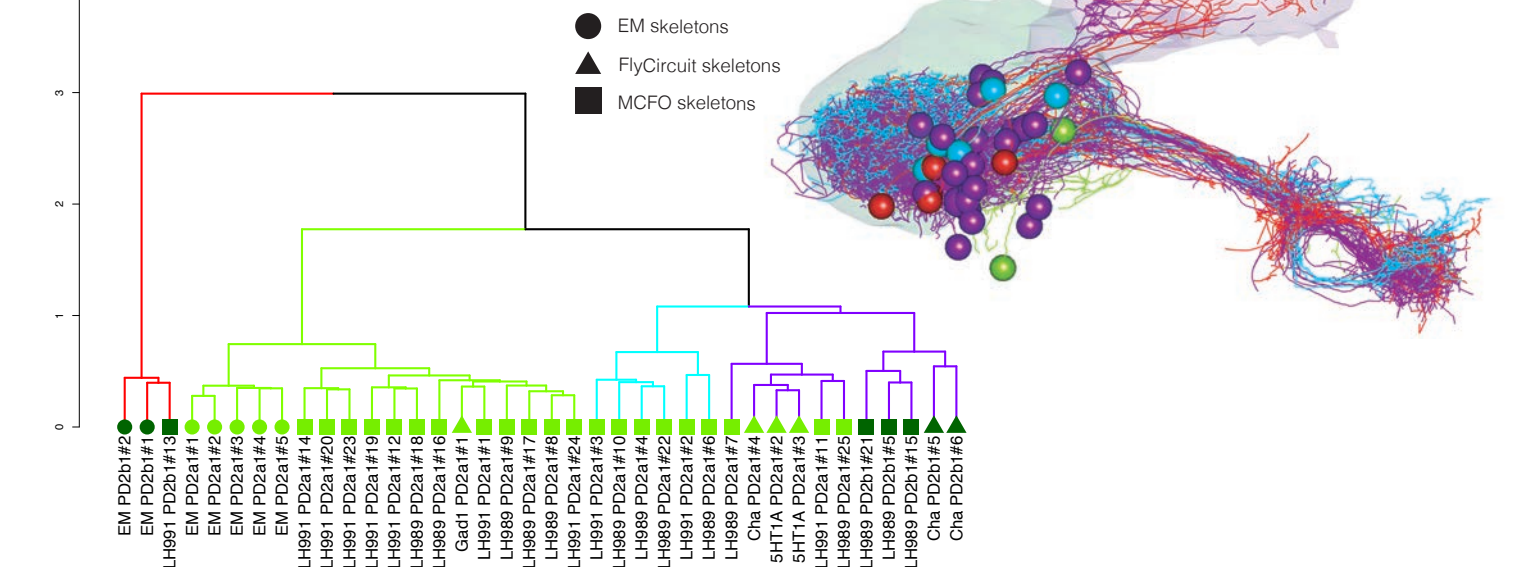

H''

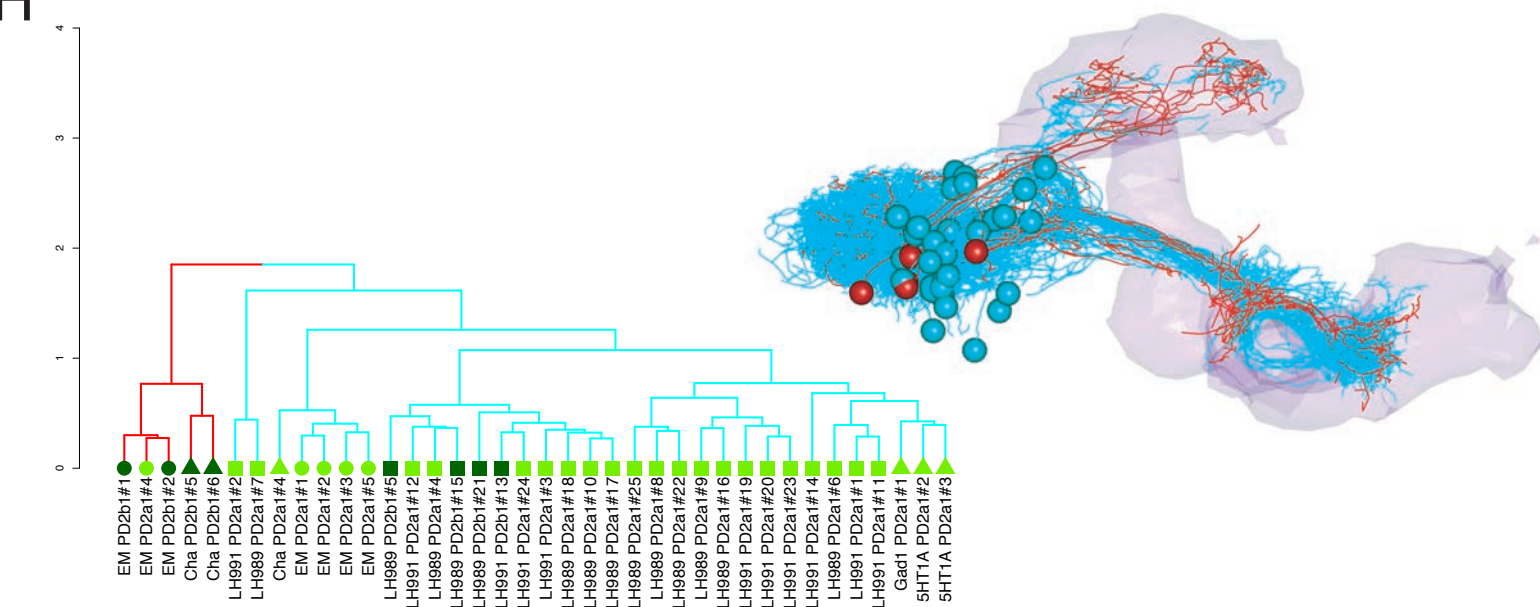

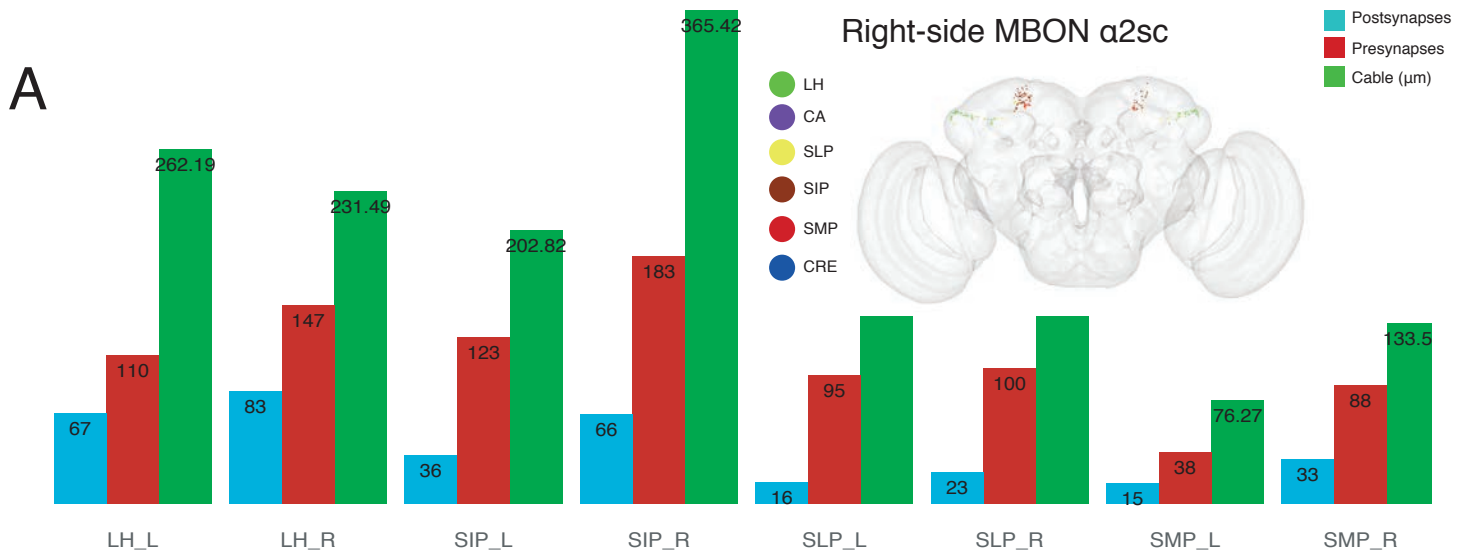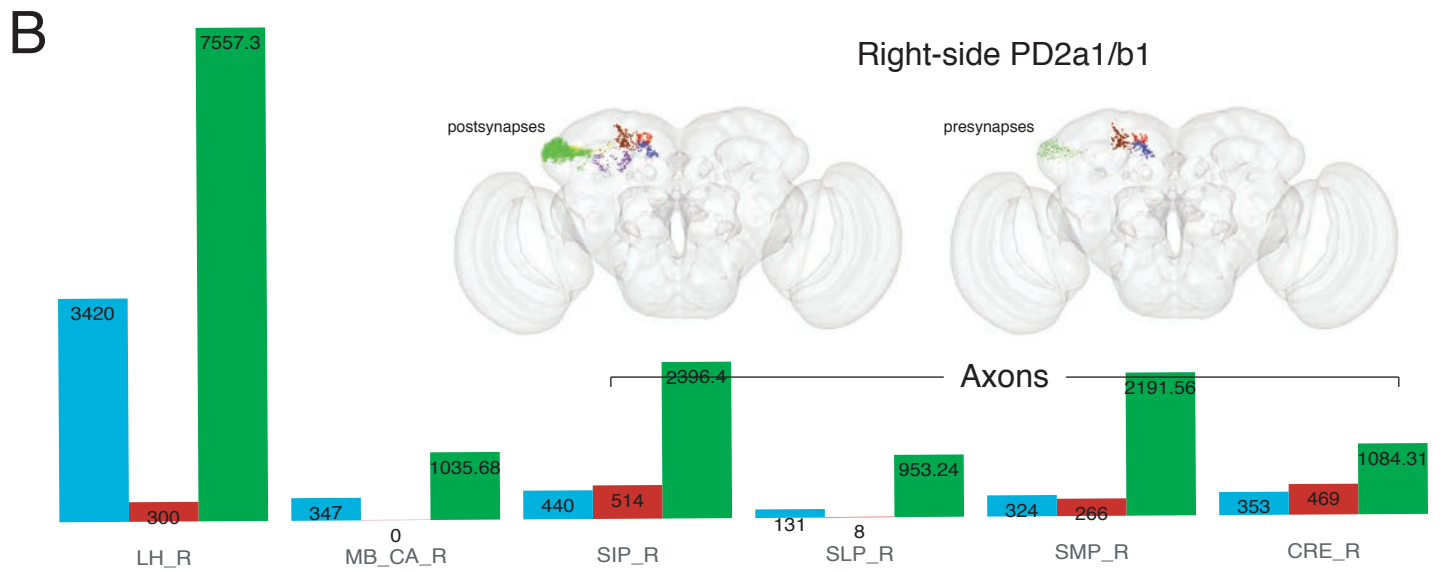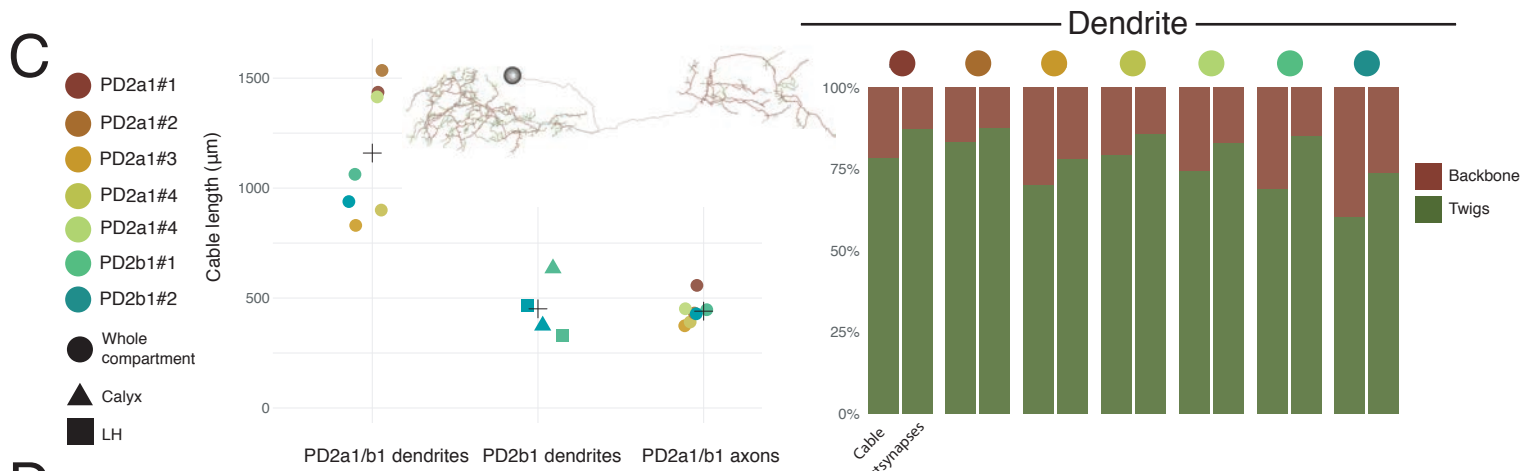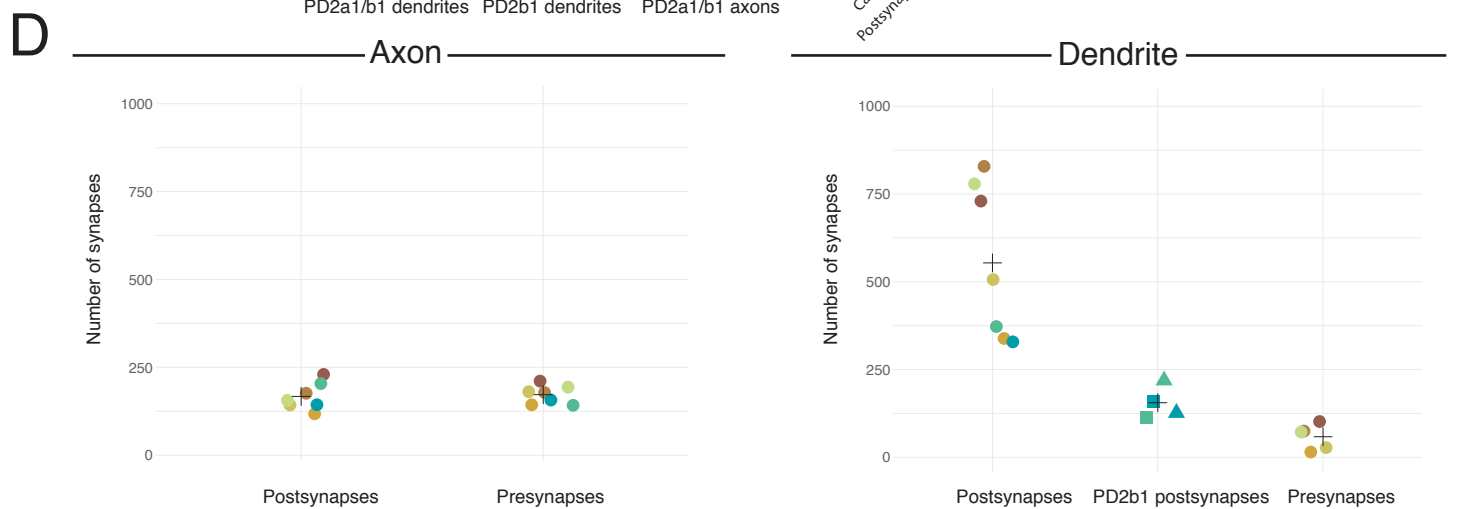

**A**

3h conditioning protocols

Oct as CS+

Single-cycle associative training

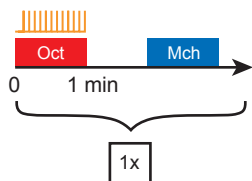

Control unpaired protocol

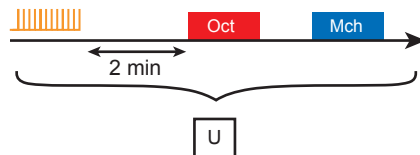**B**

3h conditioning protocols

Mch as CS+

Single-cycle associative training

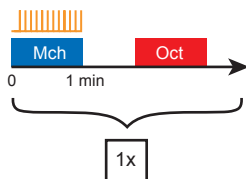

Control unpaired protocol

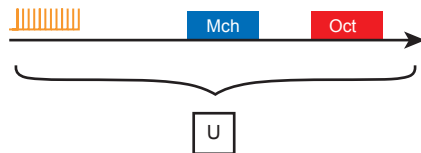**C**

24h conditioning protocols

Spaced training

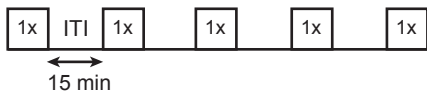

Control spaced unpaired protocol

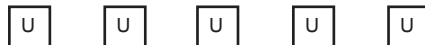

Control: No LexAop-Shibire<sup>ts</sup> transgene

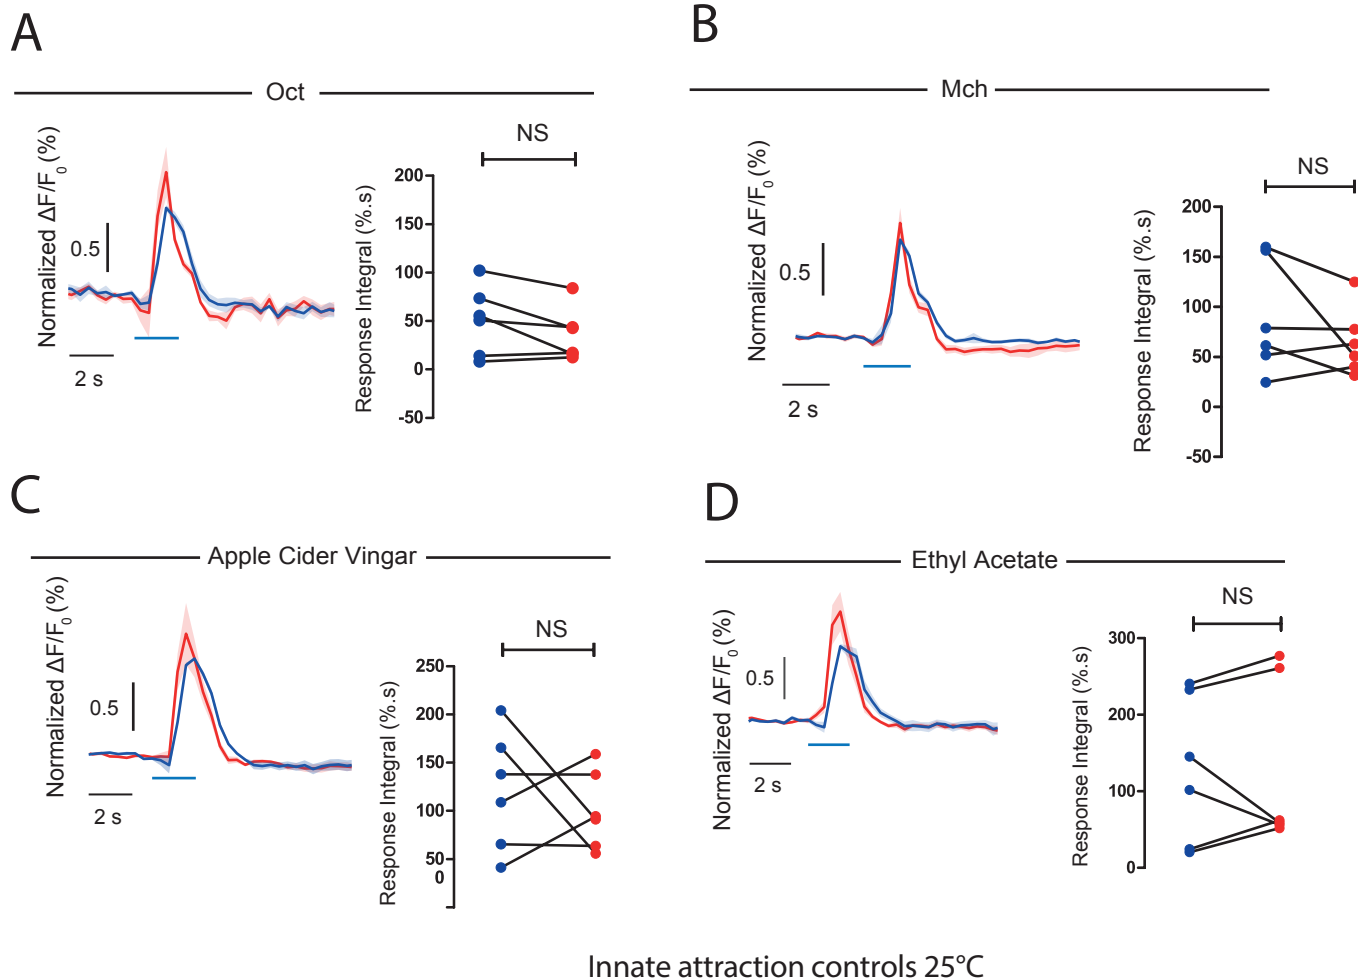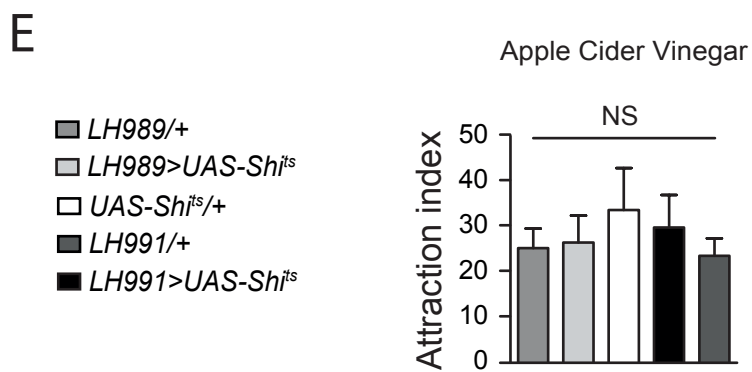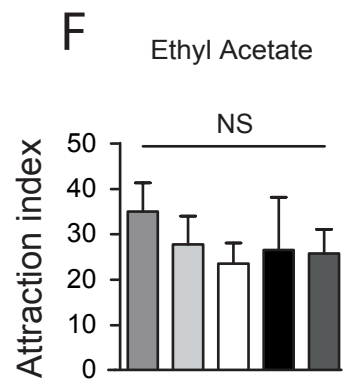

Supplement: mmc1.pdf [file mmc1.pdf]
